# Supplementary material for: Evaluation of Analysis by Cross-Validation. Part I: Using Verification Metrics
Source: Preprints.org preprint supplement (doi:10.20944/preprints201801.0217.v1), 2018-01-23
Supplement: Supplementary file 1 [file supplementary]

# Evaluation of analysis by cross-validation: Part I & Part II

Richard Ménard and Martin Deshaies-Jacques

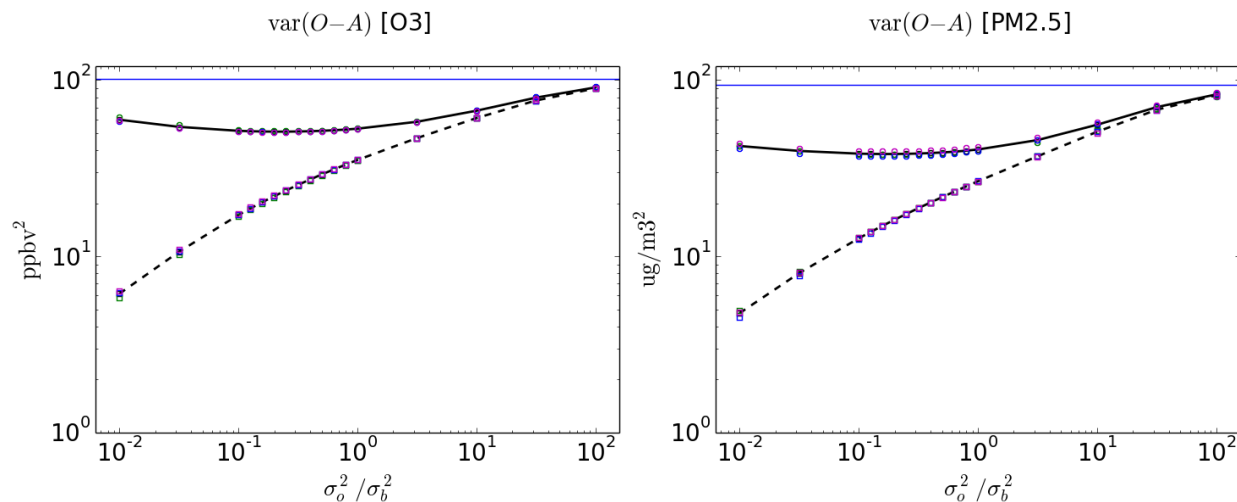

**Figure S1.** Variance of the observation-minus-residuals of O<sub>3</sub> (left panel) and PM<sub>2.5</sub> (right panel) for the individual sets of cross-validation as a function of  $\gamma = \sigma_o^2 / \sigma_b^2$ . Left panel is for O<sub>3</sub> with ordinates in ppbv<sup>2</sup> units, and right panel is for PM<sub>2.5</sub> with ordinates in  $(\mu\text{g}/\text{m}^3)^2$ . Circles are the individual subset results from the evaluation at the passive observation sites. Squares are the individual subset results from the evaluation at the active observation sites in the cross-validation experiment (i.e. using 2/3 of the observations). Blue curve is the variance of observation-minus-model. Note that the 3 subset results almost coincide.

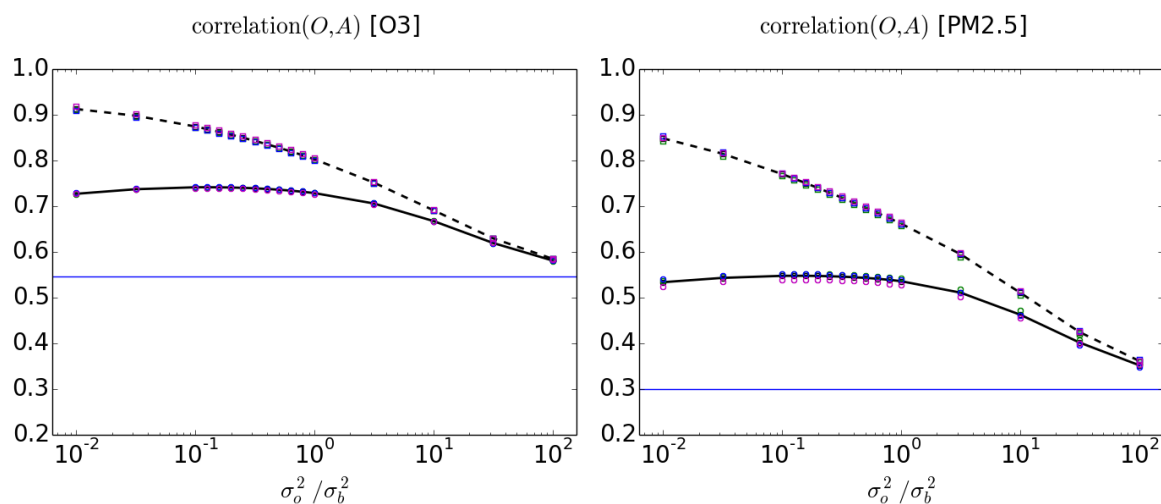

**Figure S2.** Correlation between observations and analysis of O<sub>3</sub> (left panel) and PM<sub>2.5</sub> (right panel) for the individual sets of cross-validation as a function of  $\gamma = \sigma_o^2 / \sigma_b^2$ . Symbols and lines same as for Figure S1.

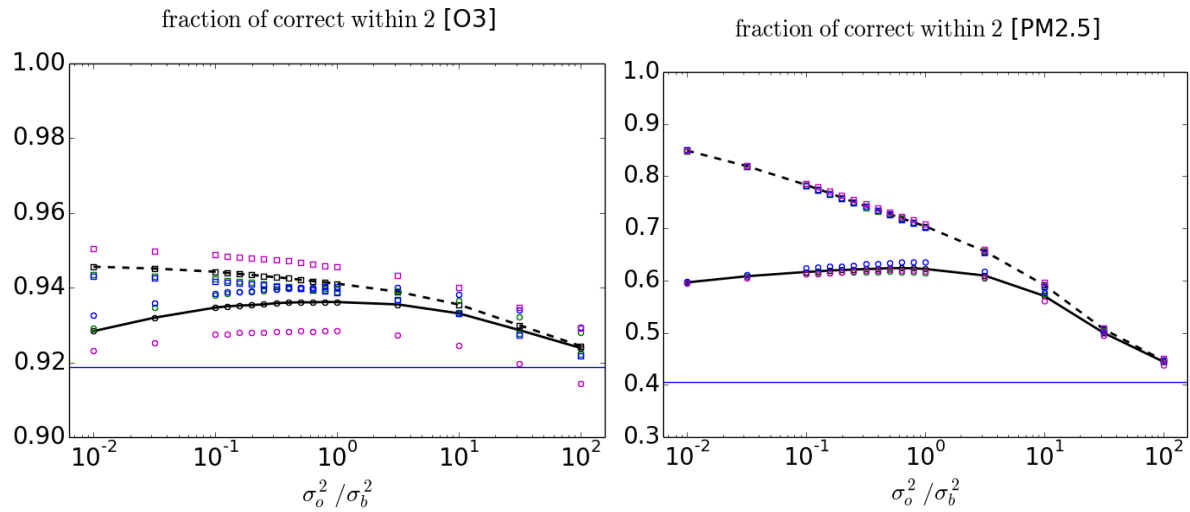

**Figure S3.** Fraction of correct within a factor 2 for  $O_3$  (left panel) and  $PM_{2.5}$  (right panel) for the individual sets of cross-validation as a function of  $\gamma = \sigma_o^2 / \sigma_b^2$ . Symbols and lines same as for Figure S1.

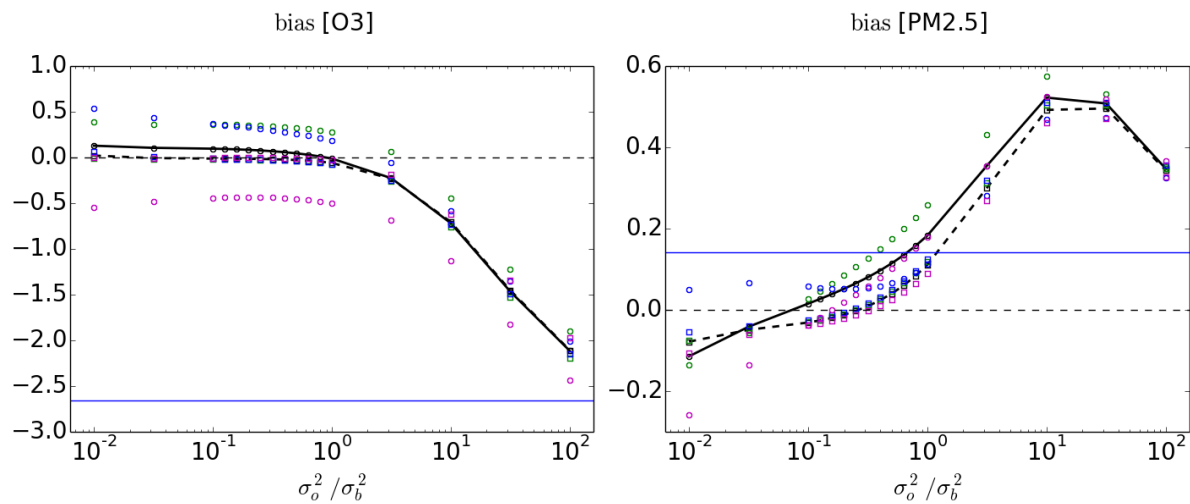

**Figure S4.** Bias between observations and analysis of  $O_3$  (left panel) and  $PM_{2.5}$  (right panel) for the individual sets of cross-validation as a function of  $\gamma = \sigma_o^2 / \sigma_b^2$ . Symbols and lines same as for Figure S1.

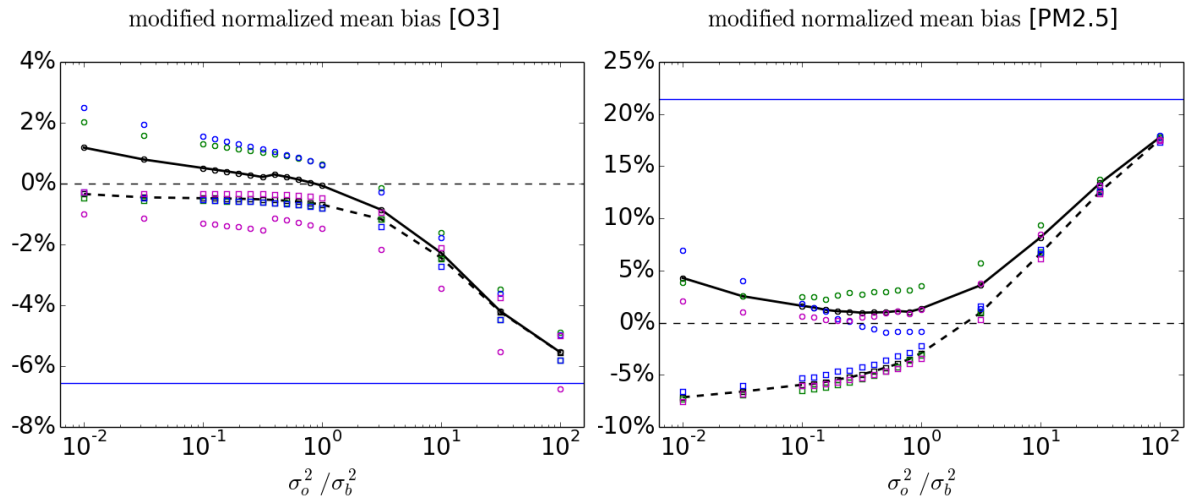

**Figure S5.** Modified normalized mean bias of O<sub>3</sub> (left panel) and PM<sub>2.5</sub> (right panel) for the individual sets of cross-validation as a function of  $\gamma = \sigma_o^2 / \sigma_b^2$ . Symbols and lines same as for Figure S1.

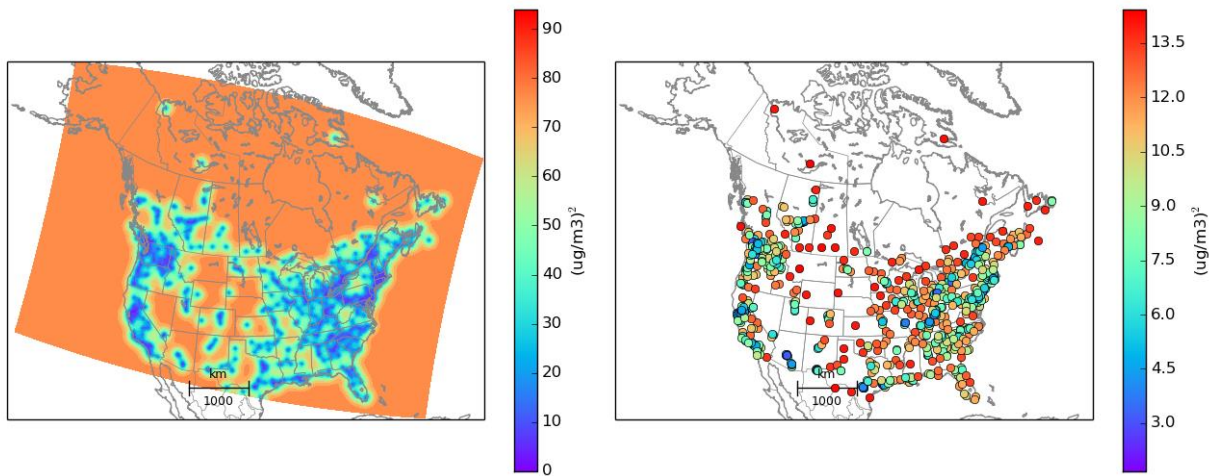

**Figure S6.** Analysis error variance for ozone optimal analysis case PM<sub>2.5</sub> iter1. Left panel is the analysis error on the model grid and on the right panel at the active observation sites. Note that the color bar of the left and right panels are different. The maximum of the color bar for the left panel correspond to  $\sigma_o^2 + \sigma_b^2$ .

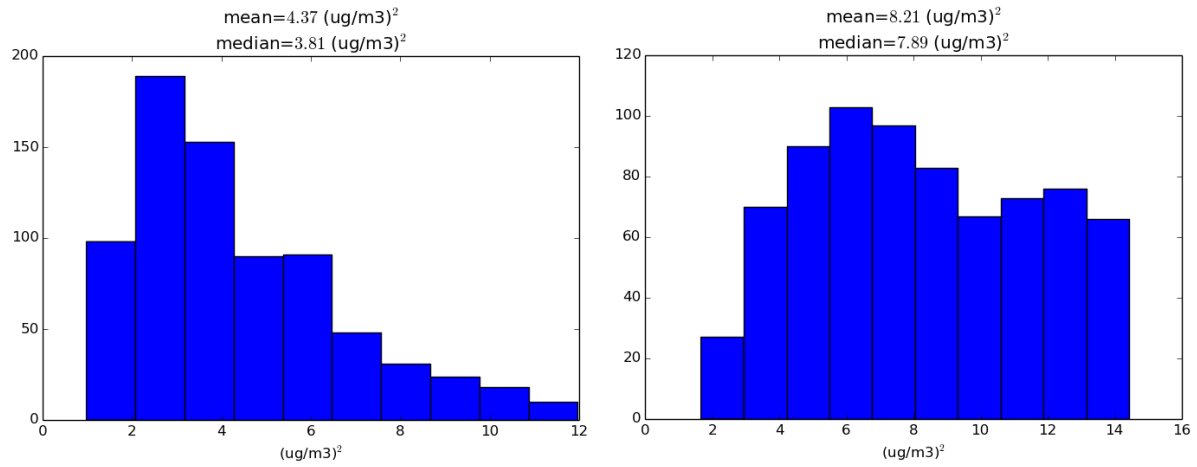

**Figure S7.** Distribution (histogram) of the ozone analysis error variance at the active observation locations. First analysis experiment PM<sub>2.5</sub> **AR2 iter0** (no optimization) on the left panel, and optimal analysis case PM<sub>2.5</sub> **AR2 iter1** on the right panel.
